# Supplementary material for: Effects of Poria cocos extract on metabolic dysfunction-associated fatty liver disease via the FXR/PPARα-SREBPs pathway
Source: PubMed Central journal article supplement (PMC9581278; doi:10.3389/fphar.2022.1007274), 2022-10-05
Supplement: DataSheet1.pdf [file DataSheet1.pdf]

## *Supplementary Material*

### **Supplementary Figure 1**

**(A)** Venn diagram of targets in *P. cocos* and metabolic dysfunction-associated fatty liver disease (MAFLD);

**(B)** Protein–protein interaction network of the potential targets;

**(C)** Gene ontology (GO) enrichment analysis for key targets;

**(D)** Organ localization result. The square represents the core target, V shape represents the system corresponding to the positioning organ, Ellipses represent localized tissues and organs.

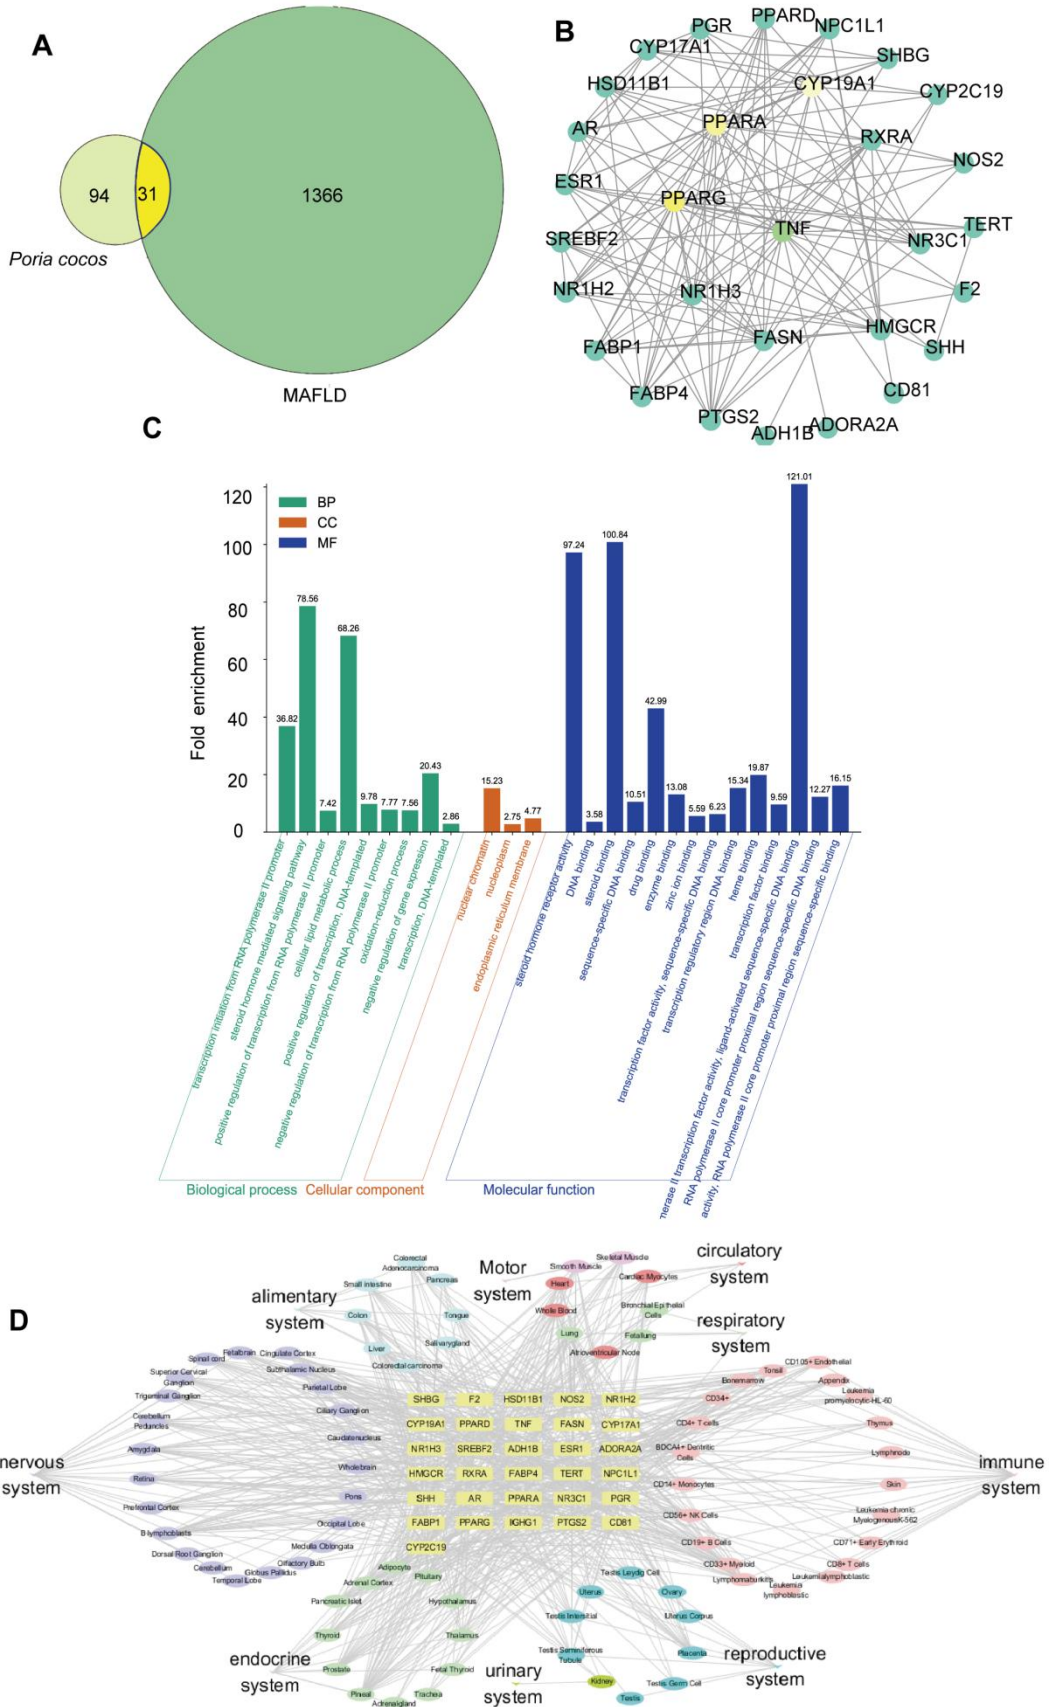

**Supplementary Figure 2 Molecular docking heat map**

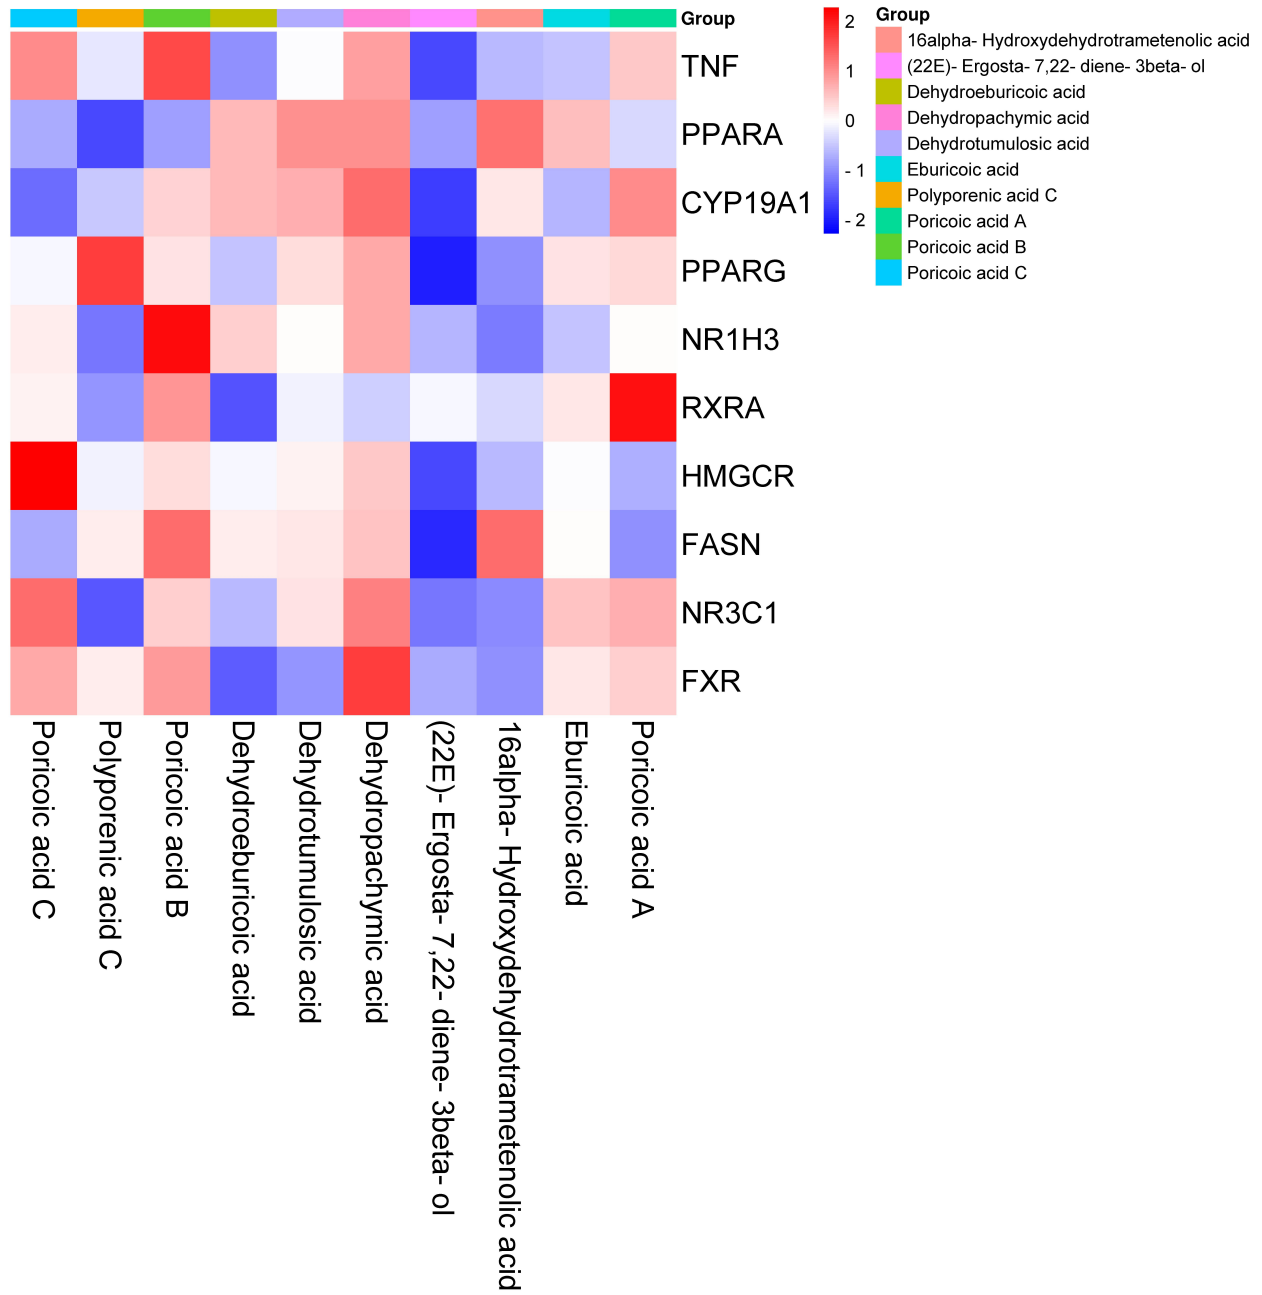

## Supplementary table 1

Table S1. Primers used for RT-qPCR analysis

| mRNA                          | Forwad                     | Rerverse                   |
|-------------------------------|----------------------------|----------------------------|
| <i>NR3C1</i>                  | TGTTAGGTGGGCGTCAAGTGATTG   | CTGTAGCAGGGTCATTTGGTCATCC  |
| <i>CYP19A1</i>                | GAGAGTCTGGATCAGTGGAGAGGAG  | CTTGCTGCCGAATCTGGAGATGTAG  |
| <i>FASN</i>                   | GTGTGGTAGGCTTGGTGAAGTGTGTC | GTGAGATGTGCTGCTGAGGTTGG    |
| <i>HMGCR</i>                  | GACCAACCTTCTACCTCAGCAAGC   | GGACAACCTCACCAGCCATCACAG   |
| <i>RXR<math>\alpha</math></i> | CTCCTTCTCCCACCGCTCCATAG    | CTCCGTTAGCACCCCTGTCAAAGATG |
| <i>SREBP-1c</i>               | TCCACCATCGGCACCCACTG       | GGCACTGGCTCCTCTTTGATTCC    |
| <i>CYP7A1</i>                 | AGAGGCTGCTTTCATTGCTTCAGG   | TCGCACCAATGTGAATCTGGCTAG   |
| <i>CYP8B1</i>                 | TTTCTGAGGGAGCGAGGGATGG     | CCTTCATGGCGTCCTGATGCTTC    |
| <i>CYP27A1</i>                | TCGCACCAATGTGAATCTGGCTAG   | CTTCCACTGCTCCATGCTGTCTC    |
| <i>CYP7B1</i>                 | GGGCCTCTCTAGCAAACACCATTC   | CGTCACGCAGGACTTCCATAGC     |
| <i>NTCP</i>                   | ACCTACAAAGCTGCTGCAACTGAG   | GGAAGGACCAGGTTGGAGAGGAG    |
| <i>BSEP</i>                   | CGGCAACGCTCCAAGTCTCAG      | GGGGCAGGTTCAACTTCTTCCAC    |
| <i>FXR</i>                    | AGGATAGAGAGGCAGTGGAGAAGC   | AGCGTGGTGATGGTTGAATGTCC    |
| <i>SCD</i>                    | TGTCAAAGAGAAGGGCGGAAAGC    | CAGGATGAAGCACATGAGCAGGAG   |

## Supplementary table 2

Table S2. *P. cocos* active ingredients

| MOL ID    | Chemical name                                                                                                                                                             | OB    | DL   |
|-----------|---------------------------------------------------------------------------------------------------------------------------------------------------------------------------|-------|------|
| MOL000273 | (2R)-2-[(3S,5R,10S,13R,14R,16R,17R)-3,16-dihydroxy-4,4,10,13,14-pentamethyl-2,3,5,6,12,15,16,17-octahydro-1H-cyclopenta[a]phenanthren-17-yl]-6-methylhept-5-enoic acid    | 30.93 | 0.81 |
| MOL000275 | trametenolic acid                                                                                                                                                         | 38.71 | 0.8  |
| MOL000276 | 7,9(11)-dehydropachymic acid                                                                                                                                              | 35.11 | 0.81 |
| MOL000279 | Cerevisterol                                                                                                                                                              | 37.96 | 0.77 |
| MOL000280 | (2R)-2-[(3S,5R,10S,13R,14R,16R,17R)-3,16-dihydroxy-4,4,10,13,14-pentamethyl-2,3,5,6,12,15,16,17-octahydro-1H-cyclopenta[a]phenanthren-17-yl]-5-isopropyl-hex-5-enoic acid | 31.07 | 0.82 |
| MOL000282 | ergosta-7,22E-dien-3beta-ol                                                                                                                                               | 43.51 | 0.72 |
| MOL000283 | Ergosterol peroxide                                                                                                                                                       | 40.36 | 0.81 |
| MOL000285 | (2R)-2-[(5R,10S,13R,14R,16R,17R)-16-hydroxy-3-keto-4,4,10,13,14-pentamethyl-1,2,5,6,12,15,16,17-octahydrocyclopenta[a]phenanthren-17-yl]-5-isopropyl-hex-5-enoic acid     | 38.26 | 0.82 |
| MOL000287 | 3beta-Hydroxy-24-methylene-8-lanostene-21-oic acid                                                                                                                        | 38.7  | 0.81 |
| MOL000289 | pachymic acid                                                                                                                                                             | 33.63 | 0.81 |
| MOL000290 | Poricoic acid A                                                                                                                                                           | 30.61 | 0.76 |
| MOL000291 | Poricoic acid B                                                                                                                                                           | 30.52 | 0.75 |
| MOL000292 | poricoic acid C                                                                                                                                                           | 38.15 | 0.75 |
| MOL000296 | hederagenin                                                                                                                                                               | 36.91 | 0.75 |
| MOL000300 | dehydroeburicoic acid                                                                                                                                                     | 44.17 | 0.83 |

## Supplementary table 3

Table S3. Topological parameters of target nodes for *P. cocos* treatment of MAFLD

| Name    | N     | BC   | CC   | EC   | LAC  |
|---------|-------|------|------|------|------|
| TNF     | 23.00 | 0.31 | 0.81 | 3.00 | 6.35 |
| PPARA   | 16.00 | 0.12 | 0.69 | 2.00 | 6.13 |
| PPARG   | 15.00 | 0.05 | 0.66 | 3.00 | 6.13 |
| CYP19A1 | 13.00 | 0.05 | 0.64 | 2.00 | 6.15 |
| RXRA    | 13.00 | 0.02 | 0.63 | 3.00 | 7.08 |
| FASN    | 13.00 | 0.04 | 0.63 | 3.00 | 7.08 |
| NR1H3   | 12.00 | 0.01 | 0.60 | 3.00 | 8.00 |
| HMGCR   | 11.00 | 0.02 | 0.60 | 3.00 | 6.91 |
| NR3C1   | 10.00 | 0.01 | 0.58 | 3.00 | 5.80 |

**Supplementary table 4**

**Table S4: Molecular docking of the main active ingredients of *P. cocos* and core proteins.**

| Core active ingredient                  | Docking Binding Energy/ kcal.mol <sup>-1</sup> |        |          |        |        |       |        |       |        |        |
|-----------------------------------------|------------------------------------------------|--------|----------|--------|--------|-------|--------|-------|--------|--------|
|                                         | TNF                                            | PPAR A | CYP 19A1 | PPAR G | NR1H 3 | RXRA  | HMG CR | FASN  | NR3C 1 | FXR    |
| Poricoic acid C                         | -3.86                                          | -6.1   | -9.42    | -3.38  | -9.51  | -5.21 | -5.9   | -8.15 | -6.85  | -8.49  |
| Polyporenic acid C                      | -4.32                                          | -7     | -8.83    |        | -12.08 | -5.93 | -6.83  | -7.49 | -8.62  | -9.05  |
| Poricoic acid B                         | -3.62                                          | -6.2   | -8.22    | -2.76  | -5.89  | -4.64 | -6.67  | -6.7  | -7.41  | -8.36  |
| Dehydroeburicoic acid                   | -4.63                                          | -4.66  | -8.03    | -4.39  | -9.04  | -6.34 | -6.8   | -7.49 | -8.07  | -10.54 |
| Dehydrotumulosic acid                   | -4.25                                          | -4.29  | -7.98    | -2.63  | -9.78  | -5.37 | -6.73  | -7.47 | -7.52  | -10.08 |
| Dehydropachymic acid                    | -3.93                                          | -4.29  | -7.56    | -1.66  | -8.42  | -5.59 | -6.6   | -7.25 | -6.96  | -7.59  |
| (22E)-Ergosta-7,22-diene-3beta-ol       | -4.88                                          | -6.16  | -9.73    | -7.54  | -11.01 | -5.33 | -7.4   | -8.96 | -8.46  | -9.92  |
| 16alpha-Hydroxydehydrotrametenolic acid | -4.49                                          | -3.98  | -8.34    | -5.34  | -11.99 | -5.52 | -7.01  | -6.68 | -8.32  | -10.14 |
| Eburicoic acid                          | -4.46                                          | -4.72  | -8.97    | -2.77  | -10.81 | -5.14 | -6.79  | -7.61 | -7.33  | -9.01  |

|                    |       |       |       |       |       |       |       |       |       |       |
|--------------------|-------|-------|-------|-------|-------|-------|-------|-------|-------|-------|
| Poricoic<br>acid A | -4.06 | -5.66 | -7.75 | -2.58 | -9.83 | -3.84 | -7.05 | -8.32 | -7.23 | -8.80 |
|--------------------|-------|-------|-------|-------|-------|-------|-------|-------|-------|-------|

---
